# Supplementary material for: Downregulation of TRAF2 Mediates NIK-Induced Pancreatic Cancer Cell Proliferation and Tumorigenicity
Source: PubMed Central journal article supplement (PMC3536768; doi:10.1371/journal.pone.0053676), 2013-01-03
Supplement: pone.0053676.s001.pdf [file pone.0053676.s001.pdf]

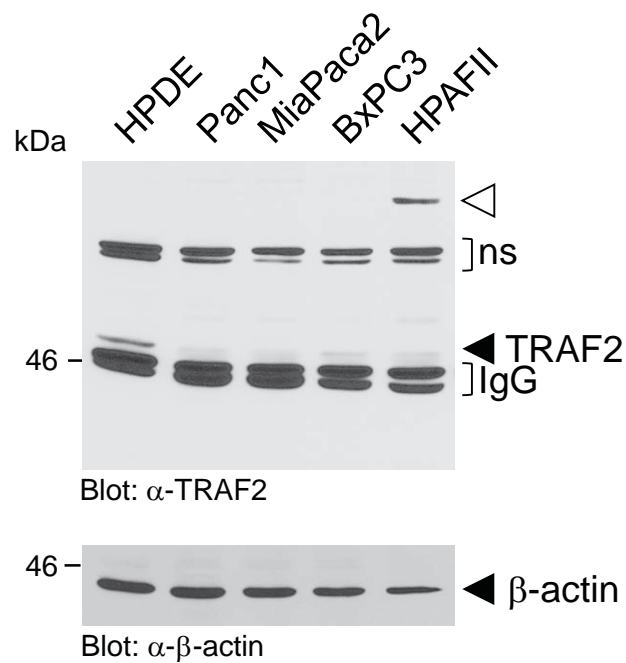

Supplemental Fig. S1: **Use of a second antibody directed against a different epitope to demonstrate that TRAF2 expression is downregulated in PDAC cell lines.** TRAF2 was immunoprecipitated and samples subjected to SDS-PAGE. Samples were transferred to nitrocellulose and analyzed by Western blot for expression of TRAF2 (anti-TRAF2, Imgenex, IMG-5760). Western blots for  $\beta$ -actin (anti- $\beta$ -actin) served as control.
