# Supplementary material for: Downregulation of TRAF2 Mediates NIK-Induced Pancreatic Cancer Cell Proliferation and Tumorigenicity
Source: PubMed Central journal article supplement (PMC3536768; doi:10.1371/journal.pone.0053676), 2013-01-03
Supplement: pone.0053676.s002.pdf [file pone.0053676.s002.pdf]

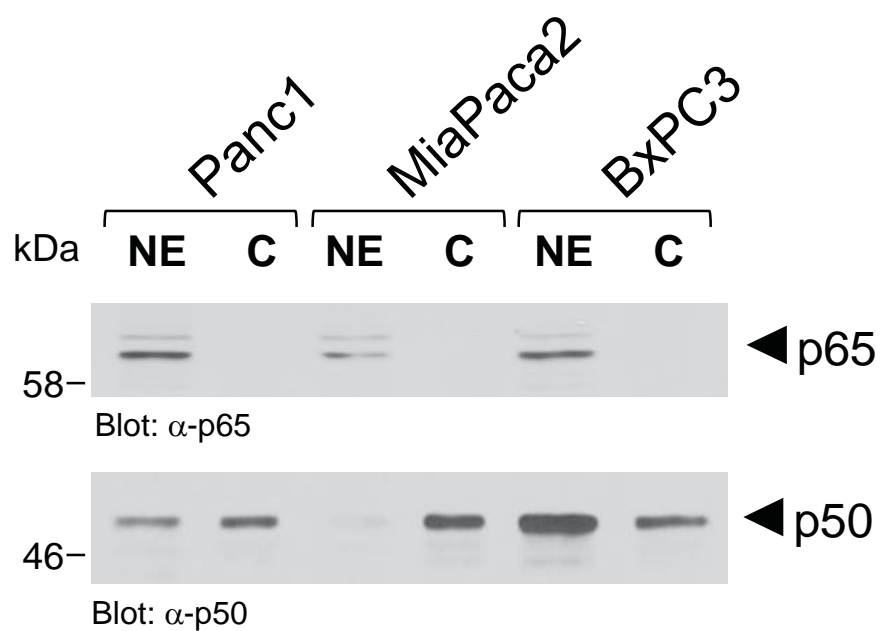

Supplemental Fig. S2: **Additional data to Figure 3B.** Nuclear extracts and cytosolic fractions of indicated cell lines (shown in Fig. 3B) were additionally analyzed by Western blotting for p65 and p50.
